# Supplementary material for: Efficient oxygen evolution on mesoporous IrOx nanosheets
Source: Royal Society of Chemistry journal article supplement (doi:10.1039/c9cy00302a), 2019-01-01
Supplement: c9cy00302a1.pdf [file c9cy00302a1.pdf]

## Characterization

A field-emission scanning electron microscope (FESEM, HITACHI SU-8000; Operating Voltage 5 kV) was used initially to characterize the morphology of the mesoporous iridium oxide nanosheets. The IrO<sub>x</sub>-150 for SEM was prepared by depositing a drop of a diluted colloidal suspension of the as-prepared nanosheets on a clean silicon (Si) substrate. Then the Si substrate and sample were annealed at 150 °C for 1 h in air prior to SEM observation. High-resolution transmission electron microscopy (HRTEM, JEOL JEM-2100F) images were collected at an operation voltage of 200 kV. The amorphous mesoporous IrO<sub>x</sub>-150 samples for TEM and HRTEM measurements were prepared by depositing a drop of a diluted solution of the as-prepared nanosheets on a TEM grid, then TEM grid and sample were heated together at 150°C in air for 1 hour. Powder X-ray diffraction (XRD) patterns were collected with a Smart lab X-ray diffractometer (RIGAKU) at a scanning rate of 1 ° min<sup>-1</sup> using a Cu K $\alpha$  radiation source (40 kV, 30 mA). Low-angle XRD measurements (Rigaku NANO-Viewer) were used to evaluate the pore-to-pore distance. X-ray photoelectron spectroscopy (XPS) was performed on a JPS-9010TR (JEOL) instrument with an Mg K $\alpha$  X-ray source. All the binding energies were calibrated using the C-1s binding energy peak (284.5 eV) as a reference. Inductively coupled plasma optical emission spectrometer (ICP-OES) was performed on a Hitachi model SPS3520UV-DD. Nitrogen adsorption-desorption isotherms were acquired by using a BELSORP-mini (BEL, Japan) at 77 K and surface area was estimated using the Multipoint Brunauer-Emmett-Teller (BET) method. Thermal gravimetric (TG) analysis was obtained with a Hitachi HT-Seiko Instrument Exter 6300 TG/DTA. Fourier transform infrared spectroscopic (FTIR) measurements were recorded on a thermoscientific Nicolet 4700 using KBr pellets. The low-angle XRD measurement used a Cu K $\alpha$  radiation (40 kV, 30 mA) source with a camera length at 700 mm. The spectra of Ir-L<sub>III</sub> edge in mesoporous IrO<sub>x</sub>-150 was measured at room temperature by using BL-01C1 at the National Synchrotron Radiation Research Center (NSRRC, Hsinchu, Taiwan), where the electron storage ring was operated at 1.5 GeV with a beam current of 300 mA.

## Electrochemical measurement

3 mg of the as-prepared nanosheets were dispersed in 5 mL ethanol/acetone mixture by ultrasonic treatment for 2 hours. Then 6 mg of the ethanol suspension containing Vulcan XC-72 carbon (1 mg mL<sup>-1</sup>) (Premetek Co.) was mixed with the above nanosheet solution and then vortexed at 900 rpm for 15 hours. The carbon supported samples were collected by centrifugation (12,000 rpm for 20 minutes) and then washed with ethanol to remove impurities and calcinated at 150 °C and 400 °C in air for 1 h to obtain the carbon supported amorphous mesoporous IrO<sub>x</sub> nanosheets and crystallized IrO<sub>2</sub> nanosheets, respectively. The carbon-supported mesoporous iridium oxide nanosheets samples and commercial IrO<sub>2</sub> were dispersed in a mixture containing water, acetone, ethanol and Nafion (5 %) and then sonicated for 1 hour to form a homogeneous catalyst ink. Catalyst-supported electrodes were prepared with a glassy carbon electrode (GCE; diameter = 3 mm). The GCE was carefully polished, washed and dried in air at room temperature. Then the catalyst suspension (6  $\mu$ L) was deposited on its

surface. The GCE was used as the working electrode after the solvent had evaporated. An inductively coupled plasma optical emission spectrometer (ICP-OES) was used to measure the concentration of iridium oxide in the samples. The Ir concentrations of the mesoporous IrO<sub>x</sub>-150 and mesoporous IrO<sub>2</sub>-400 samples were ~26 % and ~46 %, respectively. The loading amount of Ir on the glassy carbon (GC) electrode was ~7.8 µg for each electrocatalyst.

Electrochemical investigations were performed using an electrochemical workstation (BioLogic Science Instruments; VMP3) that measured cyclic voltammograms and steady-state linear-sweep voltammetry (LSV) measurements. The three-electrode cell consists of a reference electrode (saturated calomel electrode, SCE), a counter electrode (carbon rod) and a working electrode (GCE coated with catalyst). OER measurements were performed in a 0.5 M H<sub>2</sub>SO<sub>4</sub> solution at a scan rate of 5 mV·s<sup>-1</sup>. All measured potentials are relative to a reversible hydrogen electrode (RHE) following the equation:  $E_{\text{RHE}} = E_{\text{SCE}} + (0.241 + 0.059 \times \text{pH})$ . The ohmic potential drop (*iR*) losses that arise from the solution resistance were all corrected. Tafel plots of the overpotential versus the log(current density) were recorded with linear portions at low overpotentials fitted to the Tafel equation:  $\eta = a + b \log j$ , where  $\eta$  is the overpotential,  $b$  is the Tafel slope,  $j$  is the current density, and  $a$  is the exchange current density. The long-term durability of the catalysts was evaluated using chronopotentiometry in 0.5 M H<sub>2</sub>SO<sub>4</sub> at a constant current density of 2.5 mA cm<sup>-2</sup> over 12 h. The alkaline OER activity and stability of the samples were measured in 1 KOH at a constant current density of 10 mA cm<sup>-2</sup> over 10 h. Cyclic voltammetry was carried out to probe the electrochemical double layer capacitance ( $C_{\text{dl}}$ ) of three samples at non-Faradaic potentials between 1.14 and 1.24 V (*vs.* RHE in 0.5 M H<sub>2</sub>SO<sub>4</sub>) with sweep rates of 10, 20, 40, 60, 80, 100 mV s<sup>-1</sup>. By plotting the difference of current density between the anodic and cathodic sweeps at 1.19 V *vs.* RHE in 0.5 M H<sub>2</sub>SO<sub>4</sub> against the scan rate, a linear slope which is equivalent to twice the value of the  $C_{\text{dl}}$ , was obtained.

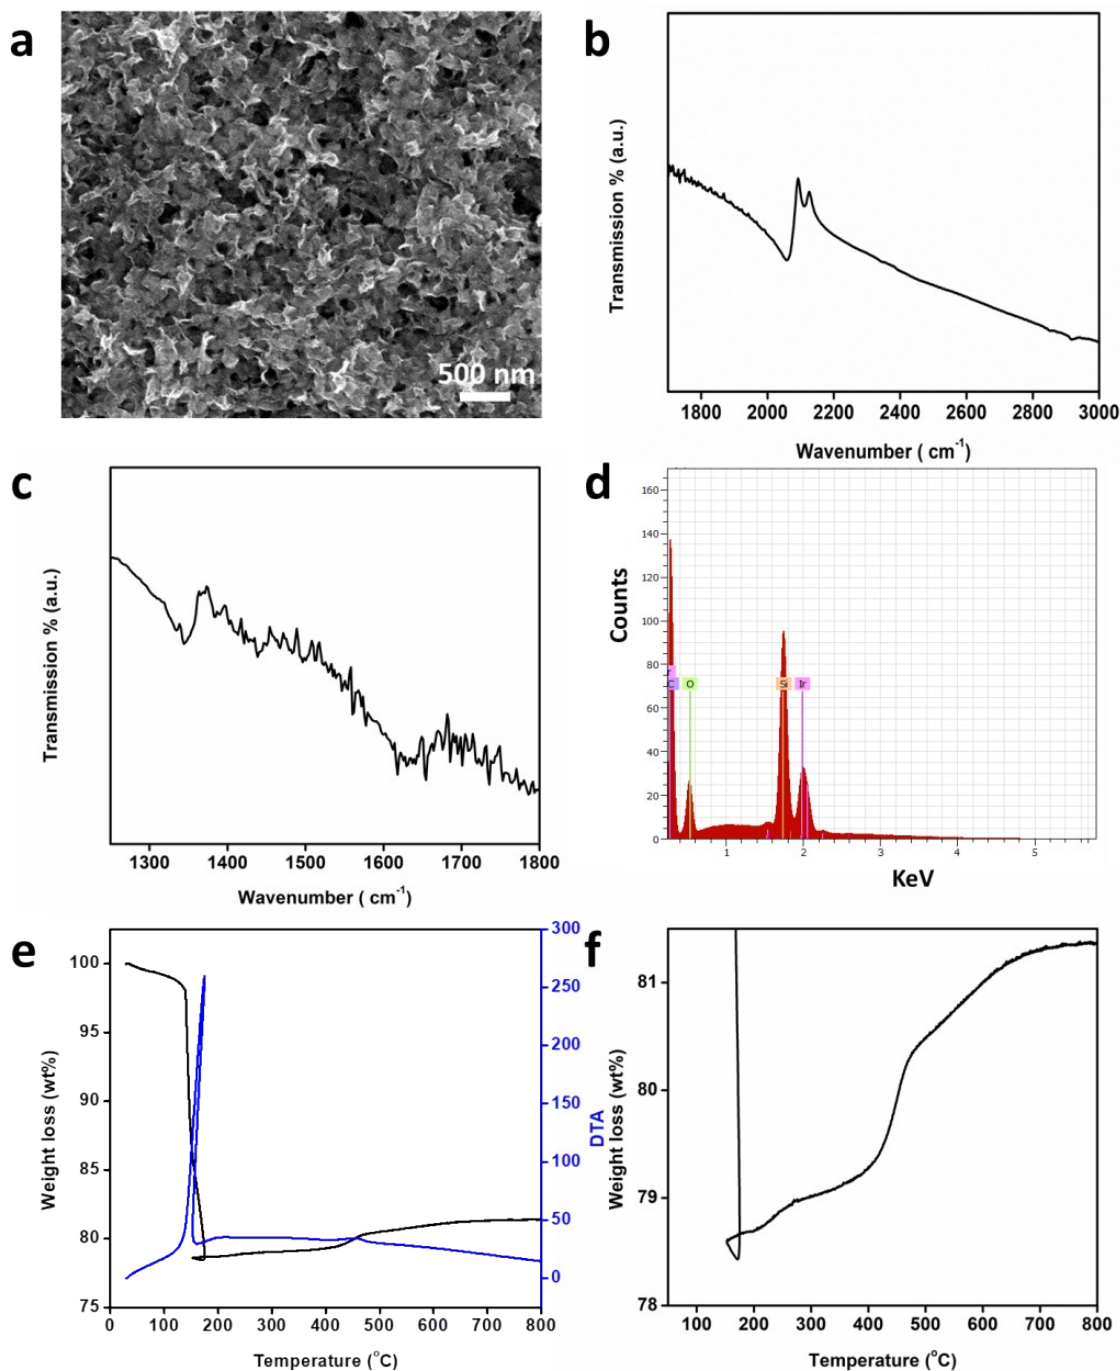

**Figure S1** Analytical and structural characterization of the as-prepared mesoporous Ir nanosheets before calcination. (a) SEM image, (b) FT-IR spectrum, (c) enlarged FTIR spectrum (d) EDX, (e) TG/DTA curves and (f) an enlarged plot of the TG curves carried out in an air atmosphere.

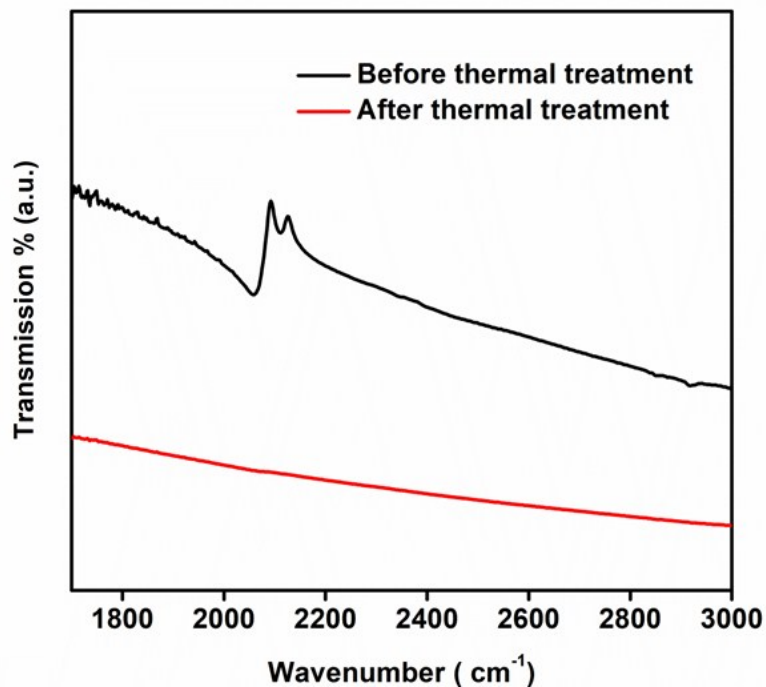

**Figure S2** FTIR spectra of the as-prepared mesoporous Ir nanosheets before and after thermal treatment.

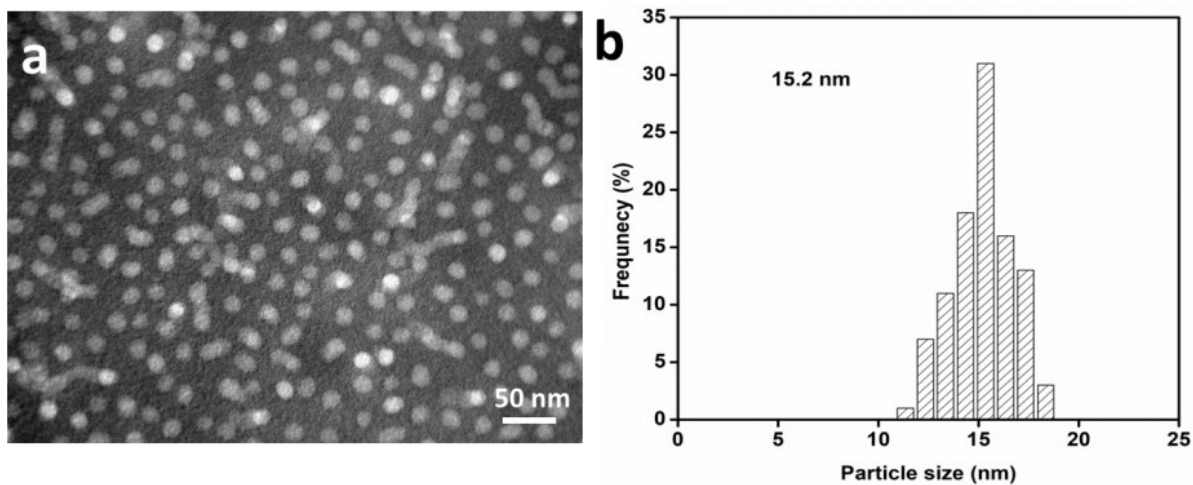

**Figure S3** (a) TEM image and (b) particle size distribution histograms showing PEO-*b*-PS polymeric micelles obtained from DMF + PEO-*b*-PS + water + formic acid +  $\text{IrCl}_3$ . 1.0 wt% phosphotungstic acid was used to stain the TEM samples.

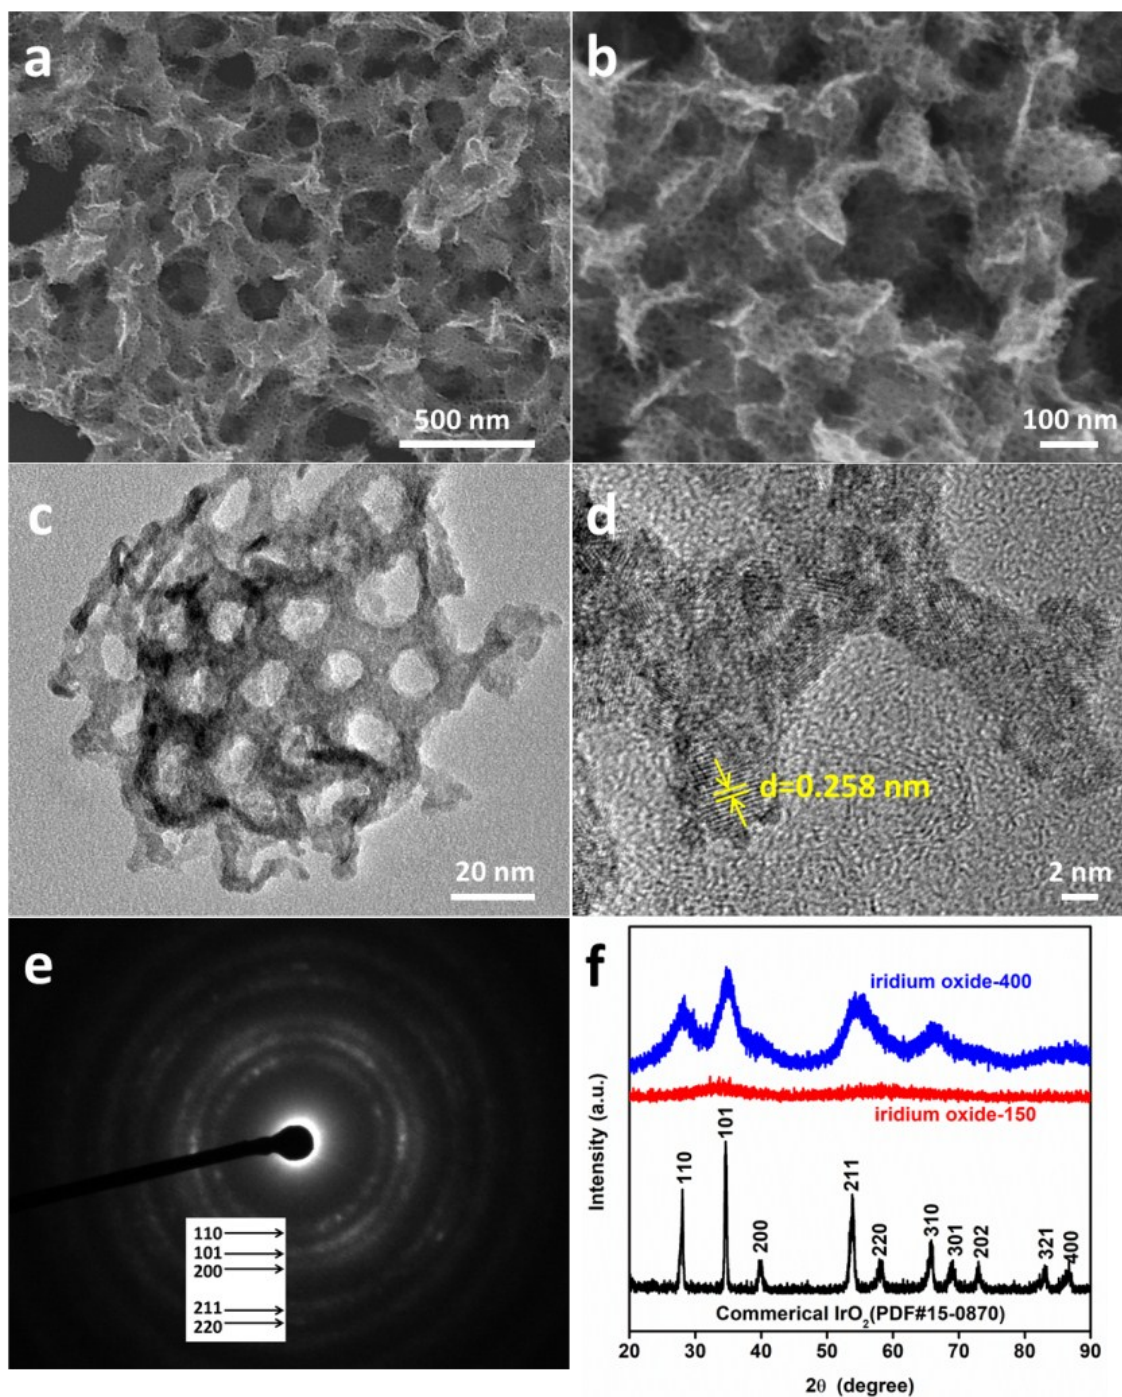

**Figure S4** (a, b) SEM images, (c, d) TEM images, and (e) ED patterns of the crystallized mesoporous  $\text{IrO}_2$ -400 nanosheets obtained by annealing them at 400 °C for 1 h at air atmosphere. (f) Wide-angle XRD patterns of commercial  $\text{IrO}_2$ , amorphous mesoporous  $\text{IrO}_x$ -150, and crystallized mesoporous  $\text{IrO}_2$ -400 samples.



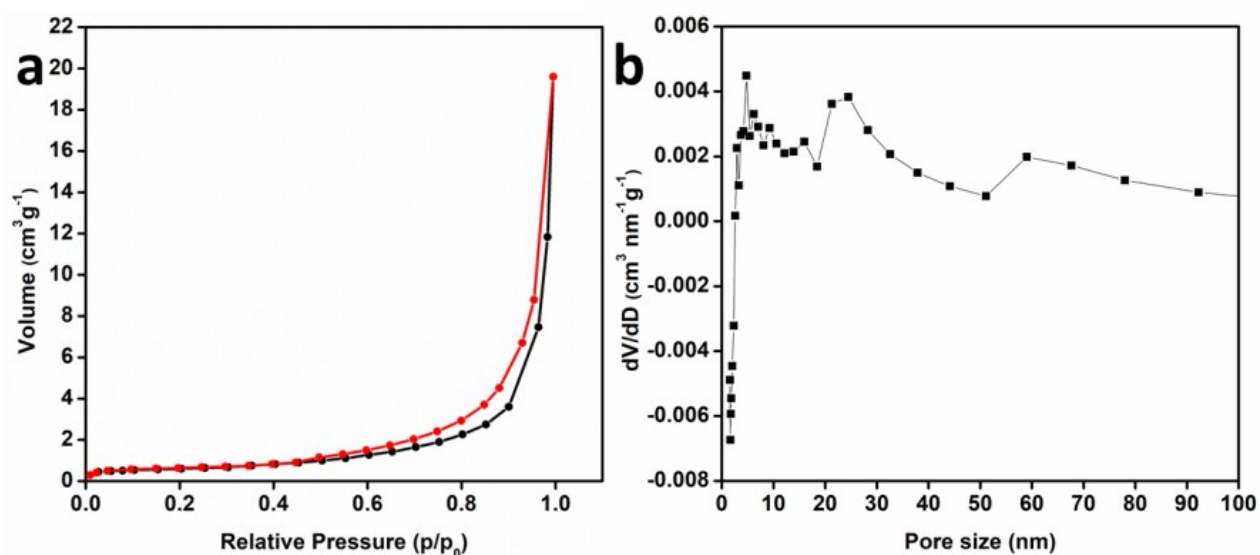

**Figure S5** (a)  $N_2$  adsorption-desorption isotherm of the commercial  $IrO_2$ . (b) BJH pore size distribution curve of the commercial  $IrO_2$ .

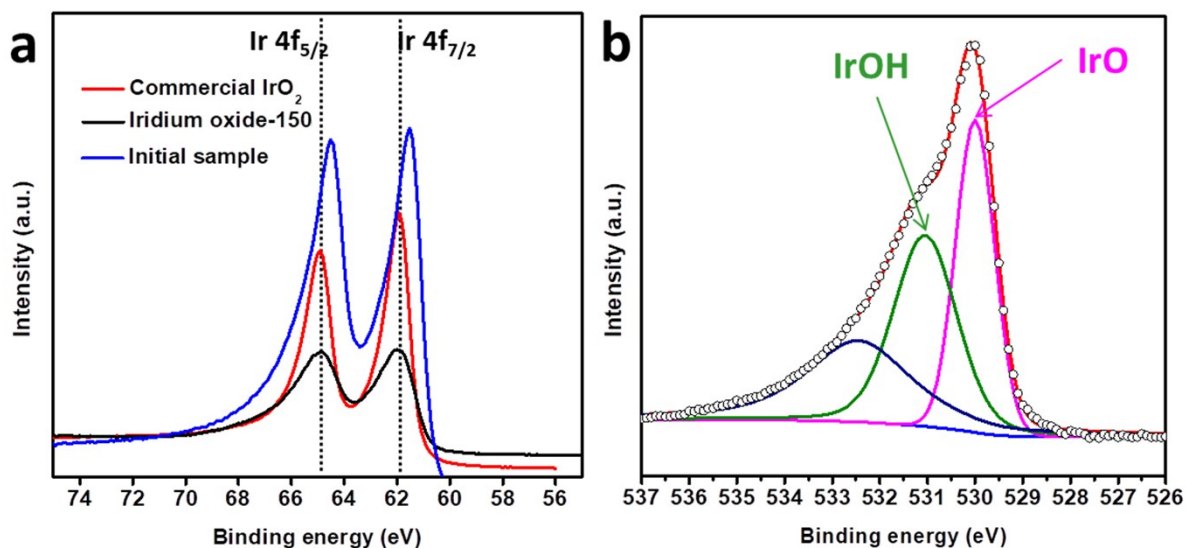

**Figure S6** (a) XPS spectra of Ir  $4f$  peaks for the  $IrO_x$ -150 and commercial  $IrO_2$  samples, and initial sample (*i.e.*, sample before heat treatment), (b) XPS spectra of O  $1s$  peak for the commercial  $IrO_2$  sample. Another unmarked O  $1s$  peak in Fig. S6b can be assigned to the presence of oxygen components from adventitious  $H_2O$  or carbon species.

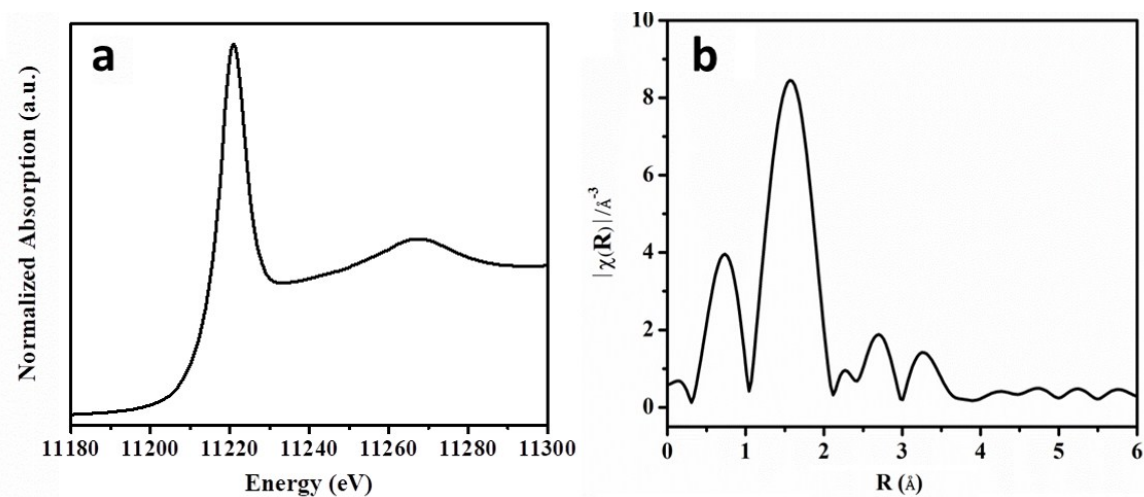

**Figure S7** (a) The Ir L<sub>3</sub>-edge XANES spectrum of IrO<sub>x</sub>-150 sample and (b) the corresponding FT curves of the Ir L<sub>3</sub>-edge EXAFS spectrum.

**Table S1.** EXAFS fitting parameters for the amorphous IrO<sub>x</sub>-150 sample.

|                       | R (Å)   | N        | ΔE (eV)  | σ <sup>2</sup> (Å <sup>2</sup> ) |
|-----------------------|---------|----------|----------|----------------------------------|
| IrO <sub>x</sub> -150 | 1.99(1) | 5.6(0.3) | 8.4(0.6) | 0.0067(1)                        |

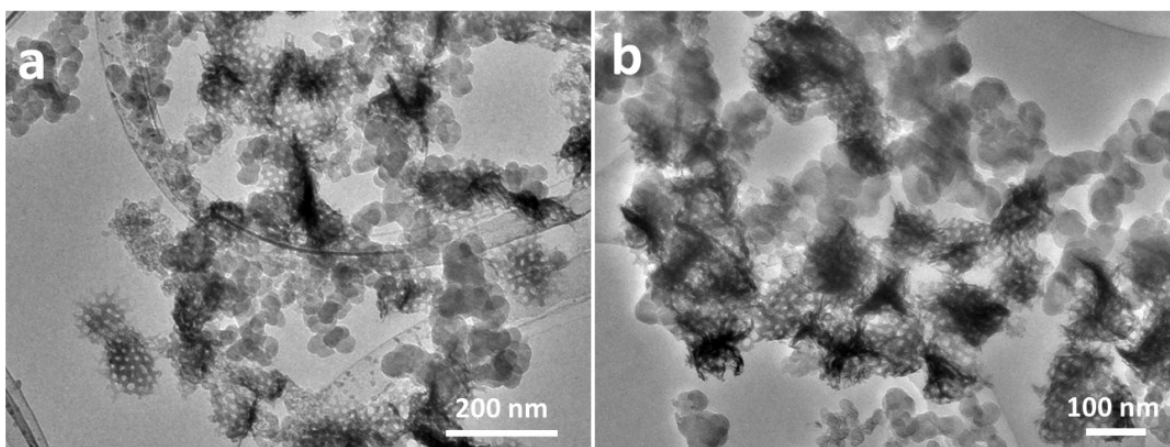

**Figure S8** TEM images of (a) amorphous mesoporous IrO<sub>x</sub>-150 and (b) mesoporous IrO<sub>2</sub>-400 samples.

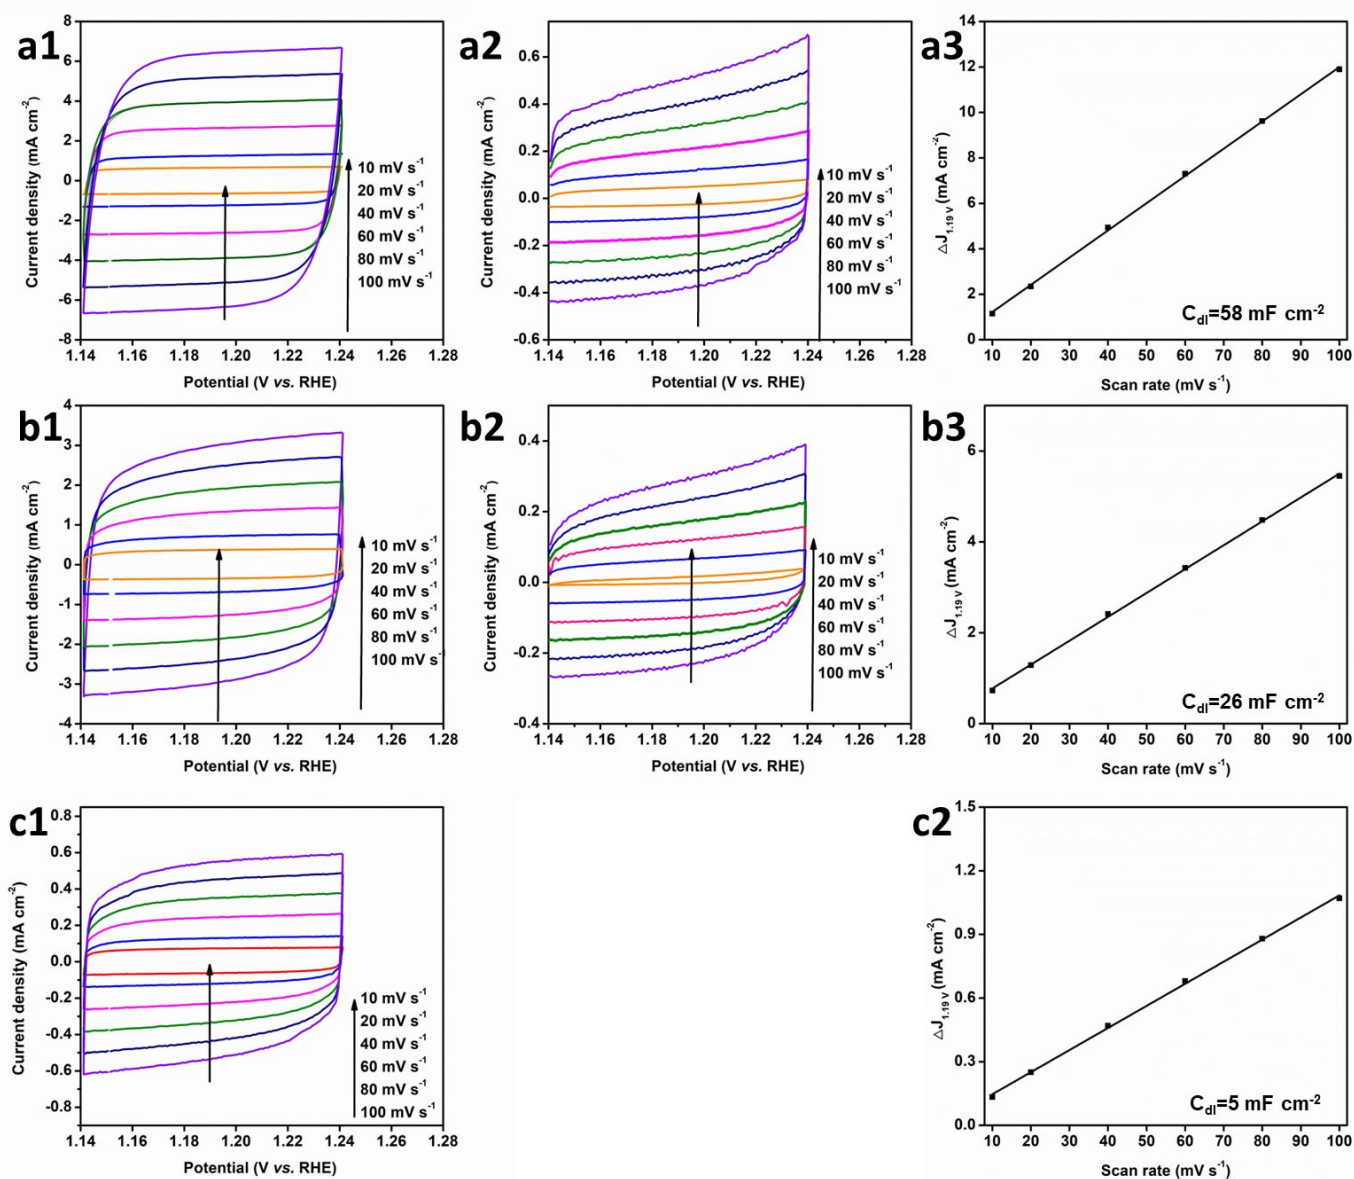

**Figure S9** Cyclic voltammograms (CVs) of (a1) IrO<sub>x</sub>-150 sample, (a2) pure carbon black and (a3) linear slope plotted from the CVs for the IrO<sub>x</sub>-150 sample after subtraction of carbon black in 0.5 M H<sub>2</sub>SO<sub>4</sub>. Cyclic voltammograms (CVs) of (b1) IrO<sub>2</sub>-400 sample, (b2) pure carbon black, and (b3) linear slope plotted from the CVs for the IrO<sub>2</sub>-400 sample after subtraction of carbon black in 0.5 M H<sub>2</sub>SO<sub>4</sub>. Cyclic voltammograms (CVs) of (c1) commercial IrO<sub>2</sub> sample and (c2) linear slope plotted from the CVs for the commercial IrO<sub>2</sub> sample after subtraction of carbon black in 0.5 M H<sub>2</sub>SO<sub>4</sub>. The linear slopes are equivalent to twice the double-layer capacitance ( $C_{dl}$ ).



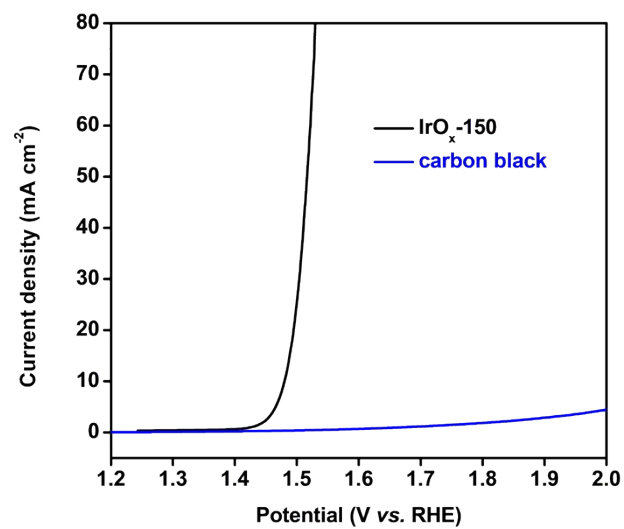

**Figure S10** Polarization curves for mesoporous IrO<sub>x</sub>-150 samples and carbon black measuring in 0.5 M H<sub>2</sub>SO<sub>4</sub> solution at the scan rate of 5 mV s<sup>-1</sup>.

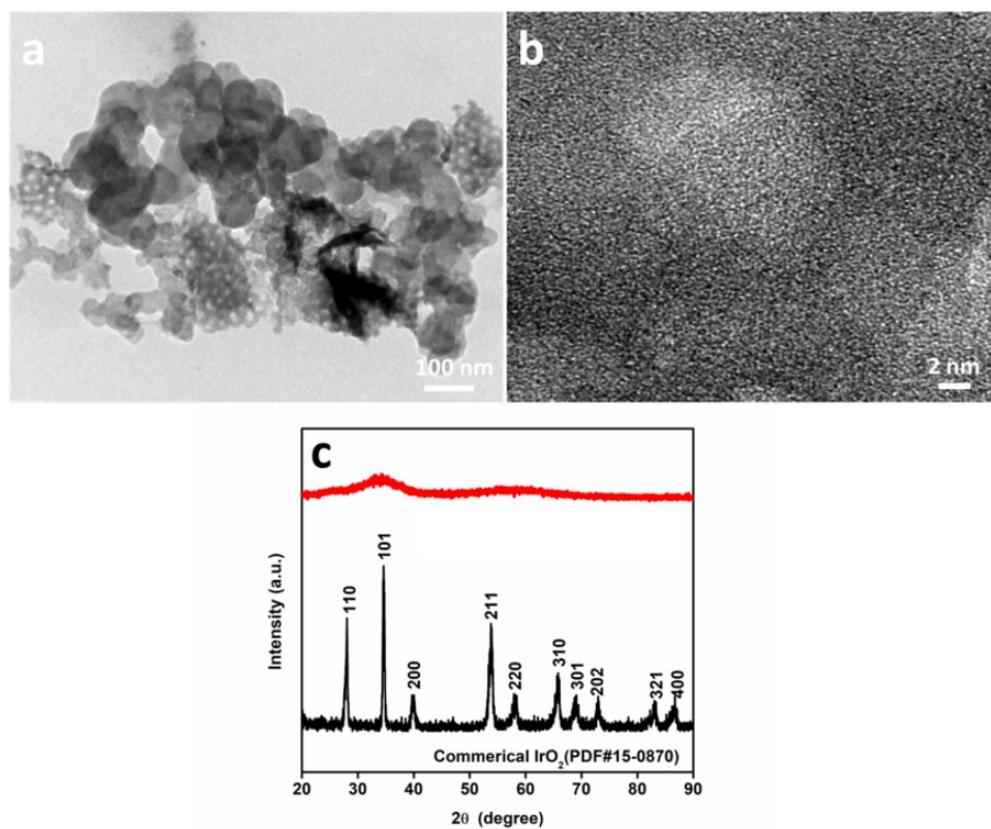

**Figure S11** (a, b) TEM images and of the carbon-supported IrO<sub>x</sub>-150 after testing. (c) Wide-angle XRD pattern of the same sample after testing.

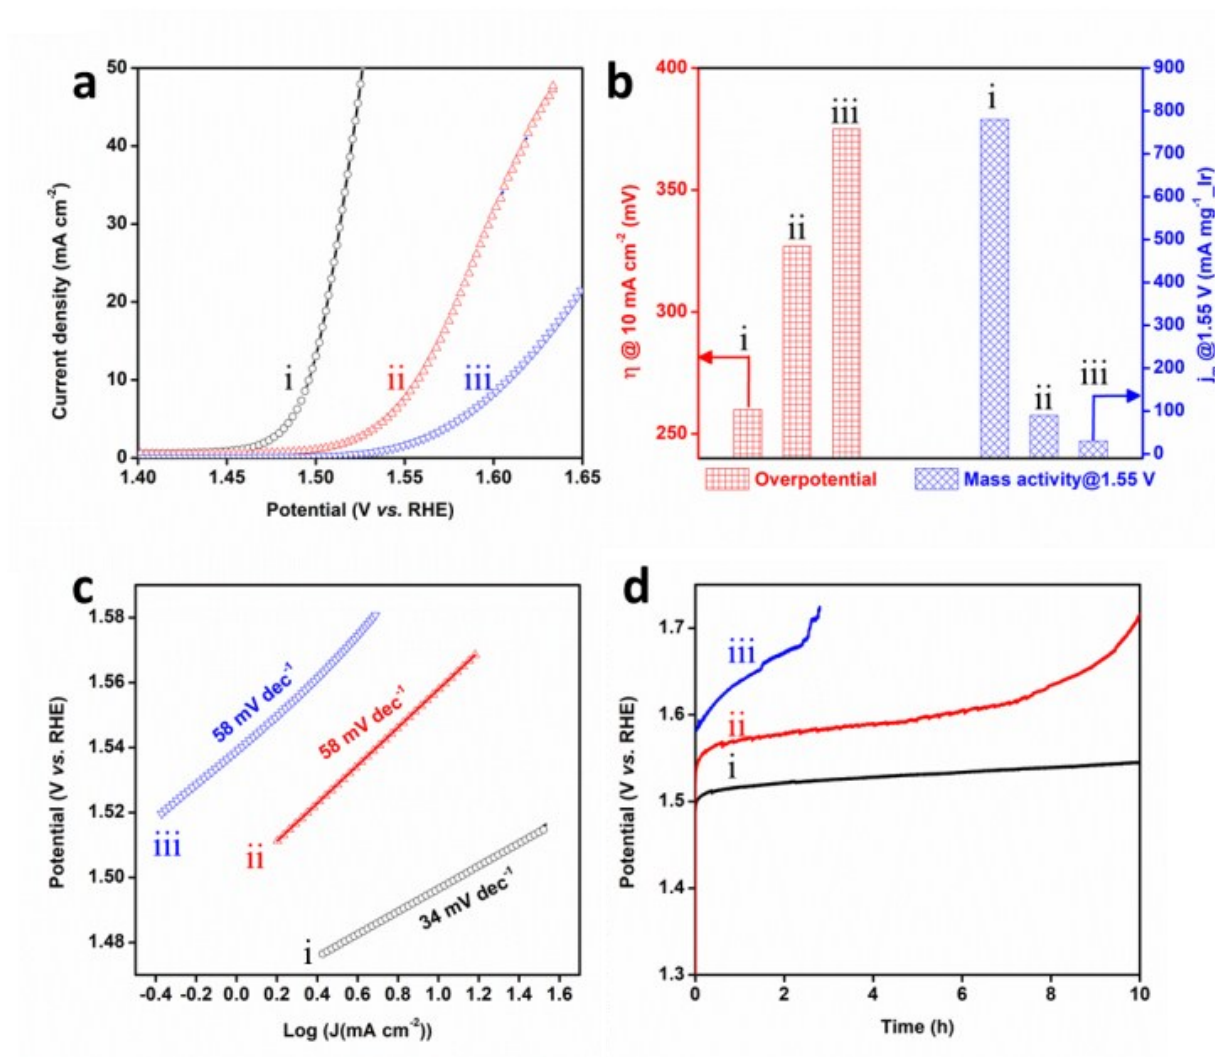

**Figure S12** (a) Polarization curves for (i) mesoporous IrO<sub>x</sub>-150, (ii) IrO<sub>2</sub>-400 and (iii) commercial IrO<sub>2</sub> samples using 1 M KOH as the electrolyte at the scan rate of 5 mV s<sup>-1</sup>. (b) Bar graph showing the overpotential ( $\eta_{10}$ ) to drive 10 mA cm<sup>-2</sup> and iridium mass activity ( $j_m$ ) at 1.55 V (vs. RHE). (c) Tafel plots. (d) Chronopotentiometry curves of the catalysts at a constant current density of 10 mA cm<sup>-2</sup>.

**Table S2.** Comparison of the activity of mesoporous Ir nanosheets with previously reported Ir-based catalysts measured in acidic solution.

| Sample name                                           | Electrolyte                              | Tafel slope<br>(mV dec <sup>-1</sup> ) | $\eta_{10}$ at<br>corresponding<br>j (mV) | Reference                                       |
|-------------------------------------------------------|------------------------------------------|----------------------------------------|-------------------------------------------|-------------------------------------------------|
| <b>Mesoporous IrO<sub>x</sub>-150<br/>nanosheets</b>  | <b>0.5 M H<sub>2</sub>SO<sub>4</sub></b> | <b>47 mV dec<sup>-1</sup></b>          | <b>250 mV</b>                             | <b>Present work</b>                             |
| IrCoNi nanoframe                                      | 0.5 M H <sub>2</sub> SO <sub>4</sub>     | 54 mV dec <sup>-1</sup>                | 303 mV                                    | <i>Adv. Mater.</i> 2017, 29,<br>1703798         |
| Ir anoparticles/graphene                              | 0.5 M H <sub>2</sub> SO <sub>4</sub>     | 46 mV dec <sup>-1</sup>                | 290 mV                                    | <i>Nano Energy</i> , 2017, 40<br>27             |
| IrO <sub>x</sub> /SrIrO <sub>3</sub>                  | 0.5 M H <sub>2</sub> SO <sub>4</sub>     | N/A                                    | 270 mV                                    | <i>Science</i> 2016,353, 1011                   |
| IrO <sub>x</sub> -Ir                                  | 0.5 M H <sub>2</sub> SO <sub>4</sub>     | ca. 44 mV dec <sup>-1</sup>            | 295 mV                                    | <i>Angew. Chem., Int. Ed.</i><br>2016, 55, 742  |
| IrO <sub>2</sub> /carbon nanotube                     | 0.5 M H <sub>2</sub> SO <sub>4</sub>     | 67 mV dec <sup>-1</sup>                | 293 mV                                    | <i>ACS Catal.</i> 2017, 7,<br>5983              |
| IrO <sub>2</sub> -RuO <sub>2</sub> @Ru                | 0.5 M H <sub>2</sub> SO <sub>4</sub>     | 53 mV dec <sup>-1</sup>                | 281 mV                                    | <i>J. Mater. Chem. A</i> ,<br>2017, 5, 17221    |
| Ir catalysts                                          | 1 M H <sub>2</sub> SO <sub>4</sub>       | N/A                                    | 340 mV                                    | <i>J. Am. Chem. Soc.</i><br>2015, 137, 4347     |
| Amorphous IrO <sub>x</sub> film                       | 1 M H <sub>2</sub> SO <sub>4</sub>       | 34 mV dec <sup>-1</sup>                | 220 mV                                    | <i>Chem. Mater.</i> 2014, 26,<br>1654           |
| IrO <sub>2</sub> nanoneedle                           | 1 M H <sub>2</sub> SO <sub>4</sub>       | 57 mV dec <sup>-1</sup>                | 313 mV                                    | <i>Adv. Funct. Mater.</i><br>2018, 28, 1704796  |
| W <sub>0.57</sub> Ir <sub>0.43</sub> O <sub>3-σ</sub> | 1 M H <sub>2</sub> SO <sub>4</sub>       | 85 mV dec <sup>-1</sup>                | 370 mV                                    | <i>Energy Environ. Sci.</i> ,<br>2017, 10, 2432 |
| IrNi oxide                                            | 0.1 M HClO <sub>4</sub>                  | N/A                                    | 310 mV                                    | <i>J. Am. Chem. Soc.</i><br>2015, 137,13031     |
| IrTe nanotubes                                        | 0.1 M HClO <sub>4</sub>                  | 60 mV dec <sup>-1</sup>                | 290 mV                                    | <i>J. Mater. Chem. A</i> ,<br>2018, 6, 8855     |
| IrO <sub>2</sub> -TiO <sub>2</sub>                    | 0.1 M HClO <sub>4</sub>                  | 42 mV dec <sup>-1</sup>                | 255 mV                                    | <i>ACS Catal.</i> 2017, 7,<br>2346              |
| Ba <sub>2</sub> PrIrO <sub>6</sub>                    | 0.1 M HClO <sub>4</sub>                  | 54 ± 3 mV dec <sup>-1</sup>            | ca. 400 mV                                | <i>Nat. Commun.</i> 2016, 7,<br>12363           |
| IrCu nanocage                                         | 0.1 M HClO <sub>4</sub>                  | 50 mV dec <sup>-1</sup>                | 293 mv                                    | <i>Adv. Funct. Mater.</i><br>2017, 27, 1604688  |
| 3D Ir superstructure                                  | 0.1 M HClO <sub>4</sub>                  | 41 mV dec <sup>-1</sup>                | 270 mV                                    | <i>Nano Lett.</i> 2016,16,<br>4424              |
| IrNiCu nanoframe                                      | 0.1 M HClO <sub>4</sub>                  | 48 mV dec <sup>-1</sup>                | 300 mV                                    | <i>ACS Nano</i> 2017, 11,<br>5500.              |
| IrNi nanoparticles                                    | 0.1 M HClO <sub>4</sub>                  | N/A                                    | 280 mV                                    | <i>Adv. Funct. Mater.</i><br>2017, 1700886      |
| Mesoporous IrO <sub>2</sub> film                      | 0.1 M HClO <sub>4</sub>                  | N/A                                    | 270 mV                                    | <i>Chem. Mater.</i> 2011, 23,<br>3201           |
| IrNiO <sub>x</sub> /Meso-ATO                          | 0.05 M H <sub>2</sub> SO <sub>4</sub>    | N/A                                    | 320 mV                                    | <i>Angew. Chem. Int. Ed.</i><br>2015,54, 2975   |
